# Supplementary material for: When driving hurts: characterizing the experience and impact of driving with back pain
Source: publisher site journal article supplement (doi:10.1515/sjpain-2020-0108), 2021-02-24
Supplement: Supplementary file 1 [file j_sjpain-2020-0108_suppl.docx]

|  |  | Total Sample  (N = 208) | Range of Scores | Positive Collision History  (n = 37) | Negative Collision History  (n = 169) |
| --- | --- | --- | --- | --- | --- |
| *Pain and*  *Psychological Characteristics* | Age | 36.60 (10.75) | 19 – 68 | 33.70 (8.96) | 37.23 (11.02) |
| Pain Duration (years) | 8.64 (6.90) | 3 - 45 | 7.89 (7.13) | 8.80 (6.85) |
| Driving Hours | 7.71 (6.43) | 0 – 50 | 9.24 (8.99) | 7.38 (5.70) |
| Pain Intensity | 5.59 (1.57) | 2 – 10 | 5.57 (1.66) | 5.59 (1.58) |
| PDI | 27.25 (13.68) | 0 – 70 | 28.81 (15.43) | 26.91 (13.30) |
| Opioid Use | 2.55 (1.95) | 1 – 7 | 2.46 (1.66) | 2.57 (2.01) |
| PCS | 20.89 (11.75) | 0 - 52 | 23.30 (13.35) | 20.36 (11.35) |
| ECIP-Driving | 23.64 (15.45) | 0 - 60 | 26.59 (17.30) | 23.00 (15.00) |
| *Pain While Driving* | Pain while driving | 3.70 (1.49) | 0 – 6 | 3.62 (1.86) | 3.72 (1.41) |
| Pain exacerbation | 3.88 (1.60) | 0 – 6 | 3.62 (1.79) | 3.94 (1.56) |
| *Affective Response*  *When Driving in Pain* | Irritable | 4.82 (2.85) | 0 - 10 | 5.16 (3.01) | 4.75 (2.82) |
| Anxious | 3.95 (3.09) | 0 - 10 | 4.08 (3.00) | 3.92 (3.12) |
| Afraid | 2.04 (2.63) | 0 - 10 | 2.11 (2.56) | 2.03 (2.65) |
|  | Irritable at drivers | 3.00 (1.81) | 0 – 6 | 3.30 (1.84) | 2.93 (1.80) |
| Irritable at passengers | 2.70 (1.84) | 0 – 6 | 3.11 (1.84) | 2.61 (1.84) |
| *Driving Behavior* | DBQ | 14.70 (14.83) | 0 - 74 | 19.68 (15.95) a | 13.61 (14.39) |
|  | DHQ | 14.95 (7.06) | 0 - 33 | 15.78 (7.78) | 14.77 (6.90) |
|  | Pain meds while driving | 1.52 (0.66) | 1 – 4 | 1.54 (0.65) | 1.52 (0.66) |
|  | Let others drive | 2.22 (0.85) | 1 – 4 | 2.43 (0.96) | 2.18 (0.82) |

**Table 2 Supplemental.** Means and standard deviations for study variables for the entire sample and for participants with various collision histories after controlling for participant low back pain duration.

*Note:* aScore is significantly different than Negative Collision History Group at *p<.*05; Driving Hours = Number of hours participants drive on average per week; PDI = Pain Disability Index; Opioid Use = The frequency that participants use opioids to deal with their pain; PCS = Pain Catastrophizing Scale; ECIP-Driving = Experience of Cognitive Intrusion of Pain Scale modified for driving in pain; Pain exacerbation = ‘Driving makes my pain worse’; DBQ = Driving Behavior Questionnaire; DHQ = Driving Habits Questionnaire avoidance subscale; Let others drive = ‘I let others drive when I’m in pain’; Given the concern over pain duration in regards to collision history, we have provided an updated table controlling for participants who have experience CLBP for at least 3 years in the supplemental materials.
